# Supplementary material
Source: Springer Nature journal article supplement (https://www.springermedizin.de/resource/supplementary/12905_2011_287_MOESM2_ESM.pdf/9518372)
Supplement: MOESM2 [file 9518372]

**Women and girls returned to Moldova**

**n= 236**

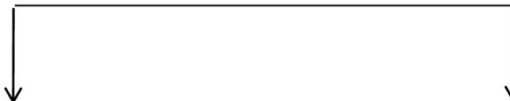

**Declined Crisis Assessment**

**n=39**

**Accepted Crisis Assessment**

**n=197**

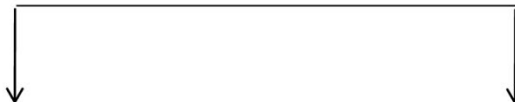

**Age 0-12, n=11**

**13-17, n=8**

**Age 18+**

**n= 178**

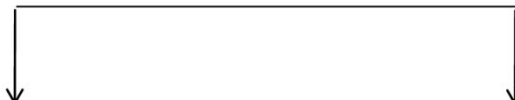

**Not Traced**

**n= 28**

**Traced for Research**

**n= 150**

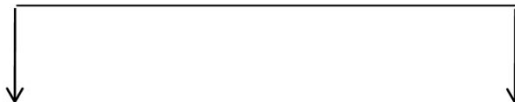

**Excluded Unwell**

**n= 2**

**Included**

**n= 148**

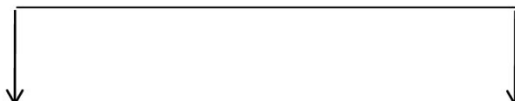

**Declined to take part**

**n= 28**

**Agreed to take part**

**n= 120**
